# Supplementary material for: Monitoring of Dabrafenib and Trametinib in Serum and Self-Sampled Capillary Blood in Patients with BRAFV600-Mutant Melanoma
Source: MDPI journal article supplement (doi:10.3390/cancers14194566), 2022-09-20
Supplement: s1 [file s1]

## Supplementary Material

### Monitoring of Dabrafenib and Trametinib in serum and self-sampled capillary blood in patients with BRAFV600-mutant melanoma

Nora Isberner<sup>1,\*</sup>, Anja Gesierich<sup>2</sup>, David Balakirouchenane<sup>3,4</sup>, Bastian Schilling<sup>2</sup>, Fatemeh Aghai-Trommeschlaeger<sup>1</sup>, Sebastian Zimmermann<sup>5</sup>, Max Kurlbaum<sup>6,7</sup>, Alicja Puszkiel<sup>3,4,8</sup>, Benoit Blanchet<sup>3,4</sup>, Hartwig Klinker<sup>1</sup>, Oliver Scherf-Clavel<sup>5</sup>

<sup>1</sup> Department of Internal Medicine II, University Hospital Würzburg, Oberdürrbacher Strasse 6, 97080 Würzburg, Germany

<sup>2</sup> Department of Dermatology, Venerology and Allergology, University Hospital Würzburg, Josef-Schneider-Strasse 2, 97080 Würzburg, Germany

<sup>3</sup> Department of Pharmacokinetics and Pharmacochimistry, Cochin Hospital, AP-HP, CARPEM, 75014 Paris, France

<sup>4</sup> Université Paris Cité, Faculté de Pharmacie, CiTCoM, 8038 CNRS, Inserm U1268, Paris, France

<sup>5</sup> Institute of Pharmacy and Food Chemistry, University of Würzburg, Am Hubland, 97074 Würzburg, Germany

<sup>6</sup> Department of Internal Medicine I, University Hospital Würzburg, Oberdürrbacher Strasse 6, 97080 Würzburg, Germany

<sup>7</sup> Core Unit Clinical Mass Spectrometry, University Hospital Würzburg, Oberdürrbacher Strasse 6, 97080 Würzburg, Germany

<sup>8</sup> Université Paris Cité, Faculté de Pharmacie, Inserm UMR-S1144, Paris, France

\* Correspondance: isberner\_n@ukw.de

..

**Supplementary Table S1. Characteristics of serum samples**

| Sample characteristic                    | No. of samples (patients) | %    |
|------------------------------------------|---------------------------|------|
| <b>Total</b>                             |                           |      |
| <b>(Hydroxy-)Dabrafenib</b>              | <b>278 (27)</b>           | 100  |
| included samples                         | 277                       | 99.6 |
| excluded samples < LLOQ <sup>a</sup>     | 1 <sup>b</sup>            | 0.4  |
| <b>Trametinib</b>                        | <b>266 (27)</b>           |      |
| included samples                         | 265                       | 99.6 |
| excluded samples < LLOQ                  | 1 <sup>c</sup>            | 0.4  |
| <b>Samples / patient, median (range)</b> |                           |      |
| <b>(Hydroxy-)Dabrafenib</b>              | 10 (1 – 22)               |      |
| <b>Trametinib</b>                        | 8 (1 – 22)                |      |
| <b>(Hydroxy-)Dabrafenib<sup>d</sup></b>  |                           |      |
| 150 mg q12h                              | 270 (27)                  | 97.5 |
| steady state samples                     | 267 (27)                  | 98.9 |
| 0-5 h post-dose                          | 105 (17)                  | 39.3 |
| 5-10 h post-dose                         | 27 (10)                   | 10.1 |
| 10-14 h post-dose                        | 101 (16)                  | 37.8 |
| > 14 h post-dose                         | 34 (14)                   | 12.7 |
| non steady state samples                 | 3 (3)                     | 1.1  |
| 100 mg q12h                              | 7 (2)                     | 2.5  |
| steady state samples                     | 7 (2)                     | 2.5  |
| non steady state samples                 | 0                         |      |
| <b>Trametinib<sup>e</sup></b>            |                           |      |
| 2 mg q24h                                | 214 (24)                  | 80.8 |
| steady state samples                     | 211 (24)                  | 98.6 |
| 0-10 h post-dose                         | 61 (14)                   | 28.9 |
| 10-20 h post-dose                        | 34 (7)                    | 16.1 |
| 20-30 h post-dose                        | 115 (19)                  | 54.5 |
| > 30 h post-dose                         | 1 (1)                     | 0.5  |
| non steady state samples                 | 3 (3)                     | 1.4  |
| 1,5 mg q24h                              | 22 (2)                    | 8.3  |
| steady state samples                     | 22 (2)                    | 8.3  |
| 0-10 h post-dose                         | 19 (2)                    | 86.4 |
| 10-20 post-dose                          | 1 (1)                     | 4.6  |
| 20-30 h post-dose                        | 2 (1)                     | 9.1  |
| > 30 h post-dose                         | 0                         |      |
| non steady state samples                 | 0                         |      |
| 1 mg q24h                                | 28 (5)                    | 11.0 |
| steady state samples                     | 28 (5)                    | 11.0 |
| 0-10 h post-dose                         | 17 (4)                    | 60.7 |
| 10-20 post-dose                          | 1 (1)                     | 3.6  |
| 20-30 h post-dose                        | 10 (3)                    | 35.7 |
| > 30 h post-dose                         | 0                         |      |
| non steady state samples                 | 0                         |      |

a LLOQ, lower limit of quantification (6 ng/mL for dabrafenib, 10 ng/mL for hydroxy-dabrafenib, 2 ng/mL for trametinib)

b sample collected at 75 mg 12 h post-dose

c sample collected at 2 mg 30 min post-dose

d steady state assumed after continuous dosing for 14 days

e steady state assumed after continuous dosing for 14 days

**Supplementary Table S2. Characteristics of VAMS samples**

| <b>Sample characteristic</b>               | <b>No. of samples (patients)</b> | <b>%</b> |
|--------------------------------------------|----------------------------------|----------|
| <b>Total</b>                               |                                  |          |
| <b>Dabrafenib</b>                          | <b>169 (18)</b>                  |          |
| at-home samples                            | 83 (9)                           | 49.1     |
| clinic samples                             | 86 (18)                          | 50.9     |
| included samples                           | 169                              | 100      |
| excluded samples < LLOQ                    | 0                                | 0        |
| excluded samples due to incorrect sampling | 8                                | 4.7      |
| <b>Trametinib</b>                          | <b>158 (18)</b>                  |          |
| at-home samples                            | 76 (8)                           | 48.1     |
| clinic samples                             | 82 (18)                          | 51.9     |
| included samples                           | 158                              | 100      |
| excluded samples < LLOQ                    | 0                                | 0        |
| excluded samples due to incorrect sampling | 8                                | 5.1      |
| <b>Samples / patient, median (range)</b>   | <b>6 (1 - 22)</b>                |          |
| <b>Dabrafenib</b>                          |                                  |          |
| 150 mg q12h                                |                                  |          |
| steady state samples                       | 145                              |          |
| non steady state samples                   | 4                                |          |
| 0-5 h post-dose                            | 64                               |          |
| 5-10 h post-dose                           | 34                               |          |
| 10-14 h post-dose                          | 45                               |          |
| > 14 h post-dose                           | 7                                |          |
| 100 mg q12h                                |                                  |          |
| steady state samples                       | 16                               |          |
| non steady state samples                   | 0                                |          |
| 0.5 h post-dose                            | 4                                |          |
| 5-10 h post-dose                           | 5                                |          |
| 10-14 h post-dose                          | 7                                |          |
| <b>Trametinib</b>                          |                                  |          |
| 2 mg q24h                                  |                                  |          |
| steady state samples                       | 116                              |          |
| non steady state samples                   | 0                                |          |
| 0-10 h post-dose                           | 47                               |          |
| 10-20 h post-dose                          | 41                               |          |
| 20-30 h post-dose                          | 28                               |          |
| 1.5 mg q24h                                |                                  |          |
| steady state samples                       | 22                               |          |
| non steady state samples                   | 0                                |          |
| 0-10 h post-dose                           | 17                               |          |
| 10-20 h post-dose                          | 4                                |          |
| 20-30 h post-dose                          | 1                                |          |
| 1 mg q24h                                  |                                  |          |
| steady state samples                       | 16                               |          |
| non steady state samples                   | 4                                |          |
| 0-10 h post-dose                           | 6                                |          |
| 10-20 h post-dose                          | 11                               |          |
| 20-30 h post-dose                          | 3                                |          |

**Supplementary Table S3. Steady state dabrafenib serum concentrations of all samples across all individuals**

| Dosing      | time interval post-dose | per patient mean steady state dabrafenib serum concentration [ng/mL] |         |        |        | number of patients contributing samples | number of samples* | samples per patient |       |
|-------------|-------------------------|----------------------------------------------------------------------|---------|--------|--------|-----------------------------------------|--------------------|---------------------|-------|
|             |                         | median                                                               | mean    | IQR    | SD     |                                         |                    | median              | range |
| 100 mg q12h | 0-5 h                   | 307.50                                                               | 307.50  | 137.50 | 194.45 | 2                                       | 2 (0)              | 1 per patient       |       |
|             | 10-14 h                 | 13.99                                                                | 13.99   |        |        | 1                                       | 5 (0)              | all from 1 patient  |       |
| 150 mg q12h | 0-5 h                   | 844.38                                                               | 1070.05 | 703.67 | 585.44 | 17                                      | 105 (0)            | 5                   | 1-18  |
|             | 5-10 h                  | 260.75                                                               | 268.69  | 194.55 | 188.77 | 10                                      | 27 (0)             | 2                   | 1-7   |
|             | 10-14 h                 | 45.03                                                                | 58.00   | 24.95  | 40.26  | 16                                      | 101 (0)            | 4.5                 | 1-18  |
|             | > 14h                   | 39.45                                                                | 70.78   | 40.66  | 109.68 | 14                                      | 34 (0)             | 1                   | 1-7   |

\* no sample was < LLOQ (6 ng/mL)

**Supplementary Table S4. Steady state hydroxy-dabrafenib serum concentrations of all samples across all individuals**

| Dosing      | time interval post-dose | per patient mean steady state hydroxy-dabrafenib serum concentration [ng/mL] |         |        |        | number of patients contributing samples | number of samples (n < LLOQ) | samples per patient |       |
|-------------|-------------------------|------------------------------------------------------------------------------|---------|--------|--------|-----------------------------------------|------------------------------|---------------------|-------|
|             |                         | median                                                                       | mean    | IQR    | SD     |                                         |                              | median              | range |
| 100 mg q12h | 0-5 h                   | 341.59                                                                       | 341.59  | 218.87 | 309.53 | 2                                       | 2 (0)                        | 1 per patient       |       |
|             | 10-14 h                 | 37.21                                                                        | 37.21   |        |        | 1                                       | 5 (0)                        | all from 1 patient  |       |
| 150 mg q12h | 0-5 h                   | 973.74                                                                       | 1210.67 | 753.64 | 780.51 | 17                                      | 105 (0)                      | 5                   | 1-18  |
|             | 5-10 h                  | 387.57                                                                       | 533.49  | 194.88 | 554.28 | 10                                      | 27 (0)                       | 2                   | 1-7   |
|             | 10-14 h                 | 76.01                                                                        | 87.26   | 51.43  | 39.68  | 16                                      | 101 (1)                      | 4.5                 | 1-18  |
|             | > 14 h                  | 59.63                                                                        | 166.26  | 32.94  | 400.91 | 14                                      | 34 (0)                       | 1                   | 1-7   |

**Supplementary Table S5. Steady state trametinib serum concentrations of all samples across all individuals**

| Dosing      | time interval<br>post-dose | per patient mean steady state<br>trametinib serum concentration [ng/mL] |       |      |      | number of patients<br>contributing<br>samples | number of<br>samples<br>(n < LLOQ) | samples per patient        |       |
|-------------|----------------------------|-------------------------------------------------------------------------|-------|------|------|-----------------------------------------------|------------------------------------|----------------------------|-------|
|             |                            | median                                                                  | mean  | IQR  | SD   |                                               |                                    | median                     | range |
| 1.0 mg q24h | 0-10 h                     | 10.75                                                                   | 10.96 | 3.33 | 4.06 | 4                                             | 17 (0)                             | 3                          | 1-10  |
|             | 10-20 h                    | 13.80                                                                   | 13.80 |      |      | 1                                             | 1 (0)                              | only 1 sample              |       |
|             | 20-30 h                    | 5.89                                                                    | 6.06  | 0.56 | 0.58 | 3                                             | 10 (0)                             | 2                          | 1-7   |
| 1.5 mg q24h | 0-10 h                     | 13.07                                                                   | 13.07 | 2.87 | 4.06 | 2                                             | 19 (0)                             | 9.5                        | 1-18  |
|             | 10-20 h                    | 8.92                                                                    | 8.92  |      |      | 1                                             | 1 (0)                              | only 1 sample              |       |
|             | 20-30 h                    | 6.94                                                                    | 6.94  |      |      | 1                                             | 2 (0)                              | all samples from 1 patient |       |
| 2 mg q24h   | 0-10 h                     | 17.50                                                                   | 18.09 | 5.82 | 5.31 | 14                                            | 62 (1*)                            |                            |       |
|             | 10-20 h                    | 12.57                                                                   | 12.79 | 3.03 | 2.34 | 7                                             | 34 (0)                             |                            |       |
|             | 20-30 h                    | 11.19                                                                   | 10.75 | 2.40 | 2.13 | 19                                            | 115 (0)                            |                            |       |

\* sample was collected 30 min post dose

**Supplementary Table S6. Observed concentrations of dabrafenib, hydroxy-dabrafenib and trametinib vs. covariates**

| Compound           | Covariate                 | groups | serum C <sub>min</sub> [ng/mL] |      |      |      | n  | p-value |
|--------------------|---------------------------|--------|--------------------------------|------|------|------|----|---------|
|                    |                           |        | median                         | IQR  | mean | SD   |    |         |
| Dabrafenib         | sex                       | male   | 39.3                           | 24.3 | 36.5 | 15   | 9  | 0.174   |
|                    |                           | female | 52.9                           | 77.8 | 75.5 | 48   | 7  |         |
|                    | age above 65              | no     | 43.5                           | 19.6 | 54.9 | 37.3 | 9  | 1       |
|                    |                           | yes    | 42.9                           | 21.1 | 51.9 | 41.8 | 7  |         |
|                    | BMI (kg/m <sup>2</sup> )  | < 30   | 42.9                           | 21.4 | 46.5 | 34.4 | 11 | 0.377   |
|                    |                           | >= 30  | 54                             | 76   | 69.1 | 44.8 | 5  |         |
|                    | moderate CYP2C8 inhibitor | no     | 44.3                           | 28.7 | 58.9 | 49   | 9  | 0.689   |
|                    |                           | yes    | 47.4                           | 17.4 | 46.9 | 15   | 6  |         |
|                    | P-gp inhibitor            | no     | 52.9                           | 86.2 | 77.8 | 54.6 | 7  | 0.351   |
|                    |                           | yes    | 41.8                           | 9.9  | 42.4 | 13.8 | 9  |         |
|                    | P-gp inducer              | no     | 48                             | 38.3 | 60.9 | 46.1 | 10 | 0.594   |
|                    |                           | yes    | 41.8                           | 9.86 | 40.4 | 9.31 | 5  |         |
|                    | PPI                       | no     | 51.6                           | 35.4 | 63.1 | 43.1 | 13 | 0.305   |
|                    |                           | yes    | 32.4                           | 9.42 | 32.4 | 13.3 | 2  |         |
| Hydroxy-dabrafenib | sex                       | male   | 72.9                           | 38.7 | 77.3 | 41   | 9  | 0.837   |
|                    |                           | female | 68.3                           | 37.5 | 86   | 44   | 7  |         |
|                    | age above 65              | no     | 77.6                           | 69.7 | 92.7 | 47.7 | 9  | 0.252   |
|                    |                           | yes    | 55.6                           | 29.1 | 66.2 | 27   | 7  |         |
|                    | BMI (kg/m <sup>2</sup> )  | < 30   | 72.9                           | 35.9 | 73.6 | 32.6 | 11 | 0.583   |
|                    |                           | >= 30  | 68.3                           | 86   | 97.6 | 56.5 | 5  |         |
|                    | moderate CYP2C8 inhibitor | no     | 78                             | 46.2 | 89.4 | 45   | 9  | 0.864   |
|                    |                           | yes    | 76.6                           | 57   | 86.3 | 38   | 6  |         |
|                    | P-gp inhibitor            | no     | 78                             | 53.8 | 100  | 44.9 | 7  | 0.351   |
|                    |                           | yes    | 70.2                           | 28   | 77.3 | 34.4 | 9  |         |
|                    | P-gp inducer              | no     | 90.9                           | 62.6 | 101  | 44.1 | 10 | 0.099   |
|                    |                           | yes    | 56.6                           | 19.5 | 62.1 | 14.3 | 5  |         |
|                    | PPI                       | no     | 78                             | 65.7 | 93.1 | 41.1 | 13 | 0.171   |
|                    |                           | yes    | 53.7                           | 16.5 | 53.7 | 23.3 | 2  |         |
| Trametinib         | sex                       | male   | 11.2                           | 2.51 | 10.6 | 1.61 | 13 | 0.692   |
|                    |                           | female | 11.3                           | 2.01 | 11.1 | 3.08 | 6  |         |
|                    | age above 65              | no     | 11.3                           | 1.6  | 10.6 | 1.7  | 12 | 0.865   |
|                    |                           | yes    | 10.9                           | 2.88 | 10.9 | 2.81 | 7  |         |
|                    | BMI                       | < 30   | 11.4                           | 1.2  | 11.2 | 2.18 | 12 | 0.219   |
|                    |                           | >= 30  | 9.79                           | 2.28 | 9.93 | 1.84 | 7  |         |
|                    | P-gp inhibitor            | no     | 11.3                           | 2.86 | 10.9 | 2.52 | 11 | 0.657   |
|                    |                           | yes    | 10.9                           | 1.85 | 10.5 | 1.59 | 8  |         |
|                    | P-gp inducer              | no     | 11.7                           | 0.95 | 11.5 | 1.81 | 11 | 0.027   |
|                    |                           | yes    | 9.68                           | 2.56 | 9.3  | 2.03 | 7  |         |
|                    | PPI                       | no     | 11.5                           | 2.58 | 10.8 | 2.43 | 14 | 0.574   |
|                    |                           | yes    | 10.9                           | 1.1  | 10.7 | 1.22 | 4  |         |

C<sub>min</sub>, trough concentration; IQR, interquartile range; SD, standard deviation; BMI, body mass index; PPI, proton pump inhibitor

**Supplementary Table S7. Co-medication of all patients stratified by potential to induce or inhibit CYP3A4 or CYP2C8**

| Drug                                                                     | CYP3A4            | Strength | CYP2C8    | Strength | Reference* |
|--------------------------------------------------------------------------|-------------------|----------|-----------|----------|------------|
| <b>Strong CYP3A4 or CYP2C8 inhibitors / inducers</b>                     |                   |          |           |          |            |
| Thiamazole                                                               | inhibitor         | strong   | -         | -        | (1)        |
| <b>Moderate CYP3A4 or CYP2C8 inhibitors / inducers</b>                   |                   |          |           |          |            |
| Amlodipine                                                               | inhibitor         | unknown  | inhibitor | moderate | (1)        |
| Clindamycin                                                              | inhibitor         | moderate | -         | -        | (1)        |
| Fluvastatin                                                              | inhibitor         | unknown  | inhibitor | moderate | (1)        |
| Irbesartan                                                               | inhibitor         | unknown  | inhibitor | moderate | (1)        |
| Levothyroxine                                                            | -                 | -        | inhibitor | moderate | (1)        |
| Spironolactone                                                           | -                 | -        | inhibitor | moderate | (1)        |
| <b>Weak CYP3A4 or CYP2C8 inhibitors / inducers</b>                       |                   |          |           |          |            |
| Candesartan                                                              | -                 | -        | inhibitor | weak     | (1)        |
| Fenofibrate                                                              | -                 | -        | inhibitor | weak     | (1)        |
| <b>CYP3A4 or CYP2C8 inhibitors / inducers of unknown strength</b>        |                   |          |           |          |            |
| Atrovastatin                                                             | -                 | -        | inhibitor | unknown  | (1)        |
| Hydrocortisone                                                           | inducer           | unknown  | inducer   | unknown  | (1)        |
| Methylprednisolone                                                       | inducer           | unknown  | inducer   | unknown  | (1)        |
| Omeprazole                                                               | inhibitor/inducer | unknown  | -         | -        | (1)        |
| Prednisolone                                                             | inducer           | unknown  | -         | -        | (1)        |
| Prednisone                                                               | inducer           | unknown  | inducer   | unknown  | (1)        |
| Simvastatin                                                              | -                 | -        | inhibitor | unknown  | (1)        |
| <b>Comedication without known effects on CYP3A4 or CYP2C8 metabolism</b> |                   |          |           |          |            |
| Acetylcysteine                                                           | -                 | -        | -         | -        | (1)        |
| Acetylsalicylic acid                                                     | -                 | -        | -         | -        | (1)        |
| Allopurinol                                                              | -                 | -        | -         | -        | (1)        |
| Amiloride                                                                | -                 | -        | -         | -        | (1)        |
| Bendroflumethiazide                                                      | -                 | -        | -         | -        | (1)        |
| Bisoprolol                                                               | -                 | -        | -         | -        | (1)        |
| Calcium                                                                  | -                 | -        | -         | -        | (1)        |
| Calcium citrate                                                          | -                 | -        | -         | -        | (1)        |
| Carvedilol                                                               | -                 | -        | -         | -        | (1)        |
| Ceftriaxone                                                              | -                 | -        | -         | -        | (1)        |
| Clonidine                                                                | -                 | -        | -         | -        | (1)        |
| Denosumab                                                                | -                 | -        | -         | -        | (1)        |
| Digitoxin                                                                | -                 | -        | -         | -        | (1)        |
| Duasterid                                                                | -                 | -        | -         | -        | (1)        |
| Edoxaban                                                                 | -                 | -        | -         | -        | (1)        |
| Enalapril                                                                | -                 | -        | -         | -        | (1)        |
| Estradiol                                                                | -                 | -        | -         | -        | (1)        |
| Hydrochlorothiazide                                                      | -                 | -        | -         | -        | (1)        |
| Ibuprofen                                                                | -                 | -        | -         | -        | (1)        |
| Ipilimumab                                                               | -                 | -        | -         | -        | (1)        |
| Iron                                                                     | -                 | -        | -         | -        | (1)        |
| Lamotrigine                                                              | -                 | -        | -         | -        | (1)        |
| Levocetiricin                                                            | -                 | -        | -         | -        | (1)        |
| Levomepromazine                                                          | -                 | -        | -         | -        | (1)        |
| Lorazepam                                                                | -                 | -        | -         | -        | (1)        |
| Magnesium                                                                | -                 | -        | -         | -        | (1)        |
| Metformin                                                                | -                 | -        | -         | -        | (1)        |



|                       |   |   |   |   |     |
|-----------------------|---|---|---|---|-----|
| Metoprolol            | - | - | - | - | (1) |
| Moxonidine            | - | - | - | - | (1) |
| Mycophenolate mofetil | - | - | - | - | (1) |
| Nivolumab             | - | - | - | - | (1) |
| Olmesartan            | - | - | - | - | (1) |
| Omega 3 fatty acids   | - | - | - | - | (1) |
| Pantoprazole          | - | - | - | - | (1) |
| Penicillin            | - | - | - | - | (1) |
| Phenprocoumon         | - | - | - | - | (1) |
| Pravastatin           | - | - | - | - | (1) |
| Quetiapine            | - | - | - | - | (1) |
| Ramipril              | - | - | - | - | (1) |
| Rivaroxaban           | - | - | - | - | (1) |
| Selenium              | - | - | - | - | (1) |
| Sitagliptin           | - | - | - | - | (1) |
| Tacrolimus            | - | - | - | - | (1) |
| Tamsulosin            | - | - | - | - | (1) |
| Tilidin               | - | - | - | - | (1) |
| Tiotropium            | - | - | - | - | (1) |
| Torsemide             | - | - | - | - | (1) |
| Triameteren           | - | - | - | - | (1) |
| Trimipramine          | - | - | - | - | (1) |
| Valsartan             | - | - | - | - | (1) |
| Venlafaxine           | - | - | - | - | (1) |
| Vitamin D3            | - | - | - | - | (1) |
| Vitamin E             | - | - | - | - | (1) |
| Xipamide              | - | - | - | - | (1) |

\*

(1) [www.drugbank.ca](http://www.drugbank.ca)

**Supplementary Table S8. Co-medication of all patients stratified by potential to induce or inhibit P-glycoprotein**

| Drug                                                         | Reference* |
|--------------------------------------------------------------|------------|
| <b>P-glycoprotein inhibitors</b>                             |            |
| Amlodipine                                                   | (1)        |
| Atrovastatin                                                 | (1)        |
| Bisoprolol                                                   | (1)        |
| Candesartan                                                  | (1)        |
| Carvedilol                                                   | (1)        |
| Fluvastatin                                                  | (1)        |
| Lamotrigine                                                  | (1)        |
| Omeprazole                                                   | (1)        |
| Simvastatin                                                  | (1)        |
| Tacrolimus                                                   | (1,2,3)    |
| Venlafaxine                                                  | (1)        |
| <b>P-glycoprotein inducers</b>                               |            |
| Acetylsalicylic acid                                         | (1)        |
| Hydrocortisone                                               | (1)        |
| Levothyroxine                                                | (1)        |
| Methylprednisolone                                           | (1)        |
| Prednisolone                                                 | (1)        |
| Spironolactone                                               | (1)        |
| <b>Co-medication without known effects on P-glycoprotein</b> |            |
| Acetylcysteine                                               | (1)        |
| Allopurinol                                                  | (1)        |
| Amiloride                                                    | (1)        |
| Bendroflumethiazide                                          | (1)        |
| Calcium                                                      | (1)        |
| Clindamycin                                                  | (1)        |
| Clonidine                                                    | (1)        |
| Denosumab                                                    | (1)        |
| Digitoxin                                                    | (1)        |
| Dutasterid                                                   | (1)        |
| Edoxaban                                                     | (1)        |
| Enalapril                                                    | (1)        |
| Fenofibrate                                                  | (1)        |
| Fluticasone                                                  | (1)        |
| Formoterol                                                   | (1)        |
| Hydrochlorothiazide                                          | (1)        |
| Ibuprofen                                                    | (1)        |
| Ipilimumab                                                   | (1)        |
| Irbesartan                                                   | (1)        |
| Iron                                                         | (1)        |
| Iron (II) glycine sulphate                                   | (1)        |
| Lacosamide                                                   | (1)        |
| Levetiracetam                                                | (1)        |
| Levocetiricin                                                | (1)        |
| Levomepromazine                                              | (1)        |
| Lorazepam                                                    | (1)        |
| Magnesium                                                    | (1)        |
| Metformin                                                    | (1)        |
| Metoprolol                                                   | (1)        |
| Moxonidine                                                   | (1)        |

|                       |     |
|-----------------------|-----|
| Mycophenolate mofetil | (1) |
| Nivolumab             | (1) |
| Olmesartan            | (1) |
| Omega 3 fatty acids   | (1) |
| Pantoprazole          | (1) |
| Penicillin            | (1) |
| Phenprocoumon         | (1) |
| Potassium             | (1) |
| Potassium citrate     | (1) |
| Pravastatin           | (1) |
| Quetiapine            | (1) |
| Ramipril              | (1) |
| Rivaroxaban           | (1) |
| Salmeterol            | (1) |
| Selenium              | (1) |
| Sitagliptin           | (1) |
| Tamsulosin            | (1) |
| Thiamazole            | (1) |
| Tilidin               | (1) |
| Tiotropium            | (1) |
| Torasemide            | (1) |
| Triamteren            | (1) |
| Trimipramine          | (1) |
| Valsartan             | (1) |
| Vitamin D3            | (1) |
| Vitamin E             | (1) |
| Xipamide              | (1) |

- \* (1) [www.drugbank.ca](http://www.drugbank.ca)
- (2) Saeki T, Ueda K, Tanigawara Y, Hori R, Komano T. Human P-glycoprotein transports cyclosporin A and FK506. J Biol Chem. 1993 Mar 25;268(9):6077-80. PMID: 7681059.
- (3) Singh H, Agarwal V, Chaturvedi S, Misra DP, Jaiswal AK, Prasad N. Reciprocal Relationship Between HDAC2 and P-Glycoprotein/MRP-1 and Their Role in Steroid Resistance in Childhood Nephrotic Syndrome. Front Pharmacol. 2019 May 22;10:558. doi: 10.3389/fphar.2019.00558. PMID: 31191307; PMCID: PMC6540828

**Supplementary Table S9. Error metrics for the individual predictions using empirical Bayesian estimates**

| Compound           | MPE [%] | MAPE [%] | MRD  |
|--------------------|---------|----------|------|
| Dabrafenib         | -5.45   | 23.68    | 1.34 |
| Hydroxy-Dabrafenib | 26.76   | 43.8     | 1.60 |
| Trametinib         | 3.9     | 15.5     | 1.23 |

**Supplementary Table S10. Summarized MAP estimates for AUC<sub>τ</sub> and trough concentrations of dabrafenib and hydroxy-dabrafenib**

| ID    | pause / dose<br>reduction /<br>discontinuation<br>due to AE | average<br>predicted<br>DAB AUC <sub>τ</sub><br>[ng · h / mL]<br>150mg q12h | average<br>predicted<br>OH-DAB AUC <sub>τ</sub><br>[ng · h / mL]<br>150mg q12h | sum of<br>predicted<br>AUC <sub>τ</sub> | average<br>predicted<br>DAB C <sub>min</sub><br>[ng/mL]<br>150mg q12h | average<br><u>observed</u><br>DAB C <sub>min</sub><br>[ng/mL] | average<br>predicted OH-<br>DAB C <sub>min</sub><br>[ng/mL]<br>150mg q12h | average<br><u>observed</u><br>OH-DAB C <sub>min</sub><br>[ng/mL] | sum of<br>observed<br>C <sub>min</sub><br>[ng/mL] |
|-------|-------------------------------------------------------------|-----------------------------------------------------------------------------|--------------------------------------------------------------------------------|-----------------------------------------|-----------------------------------------------------------------------|---------------------------------------------------------------|---------------------------------------------------------------------------|------------------------------------------------------------------|---------------------------------------------------|
| DT001 |                                                             | 5296                                                                        | 5450                                                                           | 10746                                   | 29.10                                                                 | 28.7                                                          | 62.00                                                                     | 50.61                                                            | 79.31                                             |
| DT002 |                                                             | 7809                                                                        | 4090                                                                           | 11899                                   | 121.36                                                                | 115.2                                                         | 82.73                                                                     | 74.02                                                            | 189.22                                            |
| DT003 |                                                             | 6002                                                                        | 6200                                                                           | 12202                                   | 37.30                                                                 | 41.4                                                          | 78.30                                                                     | 78.98                                                            | 120.38                                            |
| DT004 |                                                             | 5676                                                                        | 5750                                                                           | 11426                                   | 41.42                                                                 | 41.8                                                          | 82.08                                                                     | 70.16                                                            | 111.96                                            |
| DT005 |                                                             | 6240                                                                        | 17810                                                                          | 24050                                   | 51.85                                                                 | -                                                             | 510.00                                                                    | -                                                                |                                                   |
| DT006 |                                                             | 6478                                                                        | 8210                                                                           | 14688                                   | 54.00                                                                 | 54.0                                                          | 156.00                                                                    | 141.56                                                           | 195.56                                            |
| DT007 | p                                                           | 10535                                                                       | 11930                                                                          | 22465                                   | 183.21                                                                | -                                                             | 362.14                                                                    | -                                                                |                                                   |
| DT008 | d                                                           | 4720                                                                        | 6040                                                                           | 10760                                   | 20.50                                                                 | -                                                             | 67.50                                                                     | -                                                                |                                                   |
| DT009 | r                                                           | 4460                                                                        | 5040                                                                           | 9500                                    | 39.50                                                                 | 20.0                                                          | 84.50                                                                     | 72.90                                                            | 92.90                                             |
| DT010 |                                                             | 3610                                                                        | 4480                                                                           | 8090                                    | 14.12                                                                 | -                                                             | 36.55                                                                     | -                                                                |                                                   |
| DT011 | d                                                           | 8304                                                                        | 5250                                                                           | 13554                                   | 120.63                                                                | 154.7                                                         | 110.13                                                                    | 102.80                                                           | 257.50                                            |
| DT012 |                                                             | 5423                                                                        | 4370                                                                           | 9793                                    | 36.06                                                                 | 45.8                                                          | 51.00                                                                     | 56.61                                                            | 102.41                                            |
| DT013 |                                                             | 6974                                                                        | 7800                                                                           | 14774                                   | 63.25                                                                 | -                                                             | 137.50                                                                    | -                                                                |                                                   |
| DT014 |                                                             | 3145                                                                        | 2490                                                                           | 5635                                    | 50.69                                                                 | 23.0                                                          | 46.10                                                                     | 37.19                                                            | 60.19                                             |
| DT015 |                                                             | 6371                                                                        | 6800                                                                           | 13171                                   | 67.71                                                                 | 69.8                                                          | 128.43                                                                    | 122.33                                                           | 192.13                                            |
| DT017 |                                                             | 6027                                                                        | 6930                                                                           | 12957                                   | 40.64                                                                 | -                                                             | 101.73                                                                    | -                                                                |                                                   |
| DT018 |                                                             | 5944                                                                        | 5500                                                                           | 11444                                   | 42.00                                                                 | -                                                             | 78.59                                                                     | -                                                                |                                                   |
| DT019 |                                                             | 5709                                                                        | 5590                                                                           | 11299                                   | 46.04                                                                 | 44.3                                                          | 92.05                                                                     | 55.16                                                            | 99.46                                             |
| DT020 |                                                             | 5796                                                                        | 6820                                                                           | 12616                                   | 28.50                                                                 | 34.4                                                          | 80.40                                                                     | 83.13                                                            | 117.53                                            |
| DT021 | d                                                           | 3245                                                                        | 6320                                                                           | 9565                                    | 10.50                                                                 | 5.5                                                           | 62.50                                                                     | 15.36                                                            | 20.86                                             |
| DT022 |                                                             | 5100                                                                        | 4180                                                                           | 9280                                    | 78.63                                                                 | 20.8                                                          | 61.75                                                                     | 78.00                                                            | 98.80                                             |
| DT023 |                                                             | 8331                                                                        | 7890                                                                           | 16221                                   | 119.69                                                                | 129.6                                                         | 197.69                                                                    | 170.93                                                           | 300.53                                            |
| DT024 |                                                             | 6400                                                                        | 4330                                                                           | 10730                                   | 45.00                                                                 | 52.9                                                          | 53.00                                                                     | 50.08                                                            | 102.98                                            |
| DT025 |                                                             | 3608                                                                        | 5860                                                                           | 9468                                    | 30.00                                                                 | -                                                             | 97.00                                                                     | -                                                                |                                                   |
| DT026 | r                                                           | 4999                                                                        | 6440                                                                           | 11439                                   | 32.00                                                                 | 14.0                                                          | 88.57                                                                     | 37.21                                                            | 51.21                                             |
| DT027 |                                                             | 6350                                                                        | 8540                                                                           | 14890                                   | 42.29                                                                 | 51.7                                                          | 141.43                                                                    | 151.71                                                           | 203.41                                            |
| DT028 |                                                             | 8566                                                                        | 9380                                                                           | 17946                                   | 298.00                                                                | -                                                             | 468.00                                                                    | -                                                                |                                                   |

DAB, dabrafenib; OH-DAB, hydroxy-dabrafenib

**Supplementary Table S11. Summarized MAP estimates for AUC<sub>T</sub> and trough concentrations of trametinib**

| ID    | pause / dose<br>reduction /<br>discontinuation<br>due to AE | predicted AUC <sub>T</sub><br>[ng · h /mL]<br>2 mg q24h | predicted C <sub>min</sub><br>[ng/mL]<br>2 mg q24h | average <u>observed</u><br>C <sub>min</sub> [ng/mL] |
|-------|-------------------------------------------------------------|---------------------------------------------------------|----------------------------------------------------|-----------------------------------------------------|
| DT001 |                                                             | 313.09                                                  | 10.51                                              | 10.1                                                |
| DT002 |                                                             | 358.36                                                  | 12.66                                              | 12.6                                                |
| DT003 |                                                             | 287.59                                                  | 9.53                                               | 11.2                                                |
| DT004 | r                                                           | 326.00                                                  | 11.51                                              | 11.8                                                |
| DT005 | d                                                           | 546.25                                                  | 20.17                                              | -                                                   |
| DT006 |                                                             | 334.62                                                  | 11.67                                              | 11.9                                                |
| DT007 |                                                             | 331.39                                                  | 11.54                                              | -                                                   |
| DT008 | d                                                           | 326.05                                                  | 11.36                                              | 9.2                                                 |
| DT009 | r                                                           | 342.83                                                  | 12.02                                              | 11.9                                                |
| DT010 |                                                             | 300.6                                                   | 10.34                                              | 9.1                                                 |
| DT011 | d                                                           | 442.00                                                  | 15.76                                              | 15.9                                                |
| DT012 |                                                             | 228.19                                                  | 7.27                                               | 7.2                                                 |
| DT013 |                                                             | 450.43                                                  | 16.60                                              | -                                                   |
| DT014 |                                                             | 325.51                                                  | 11.37                                              | 10.7                                                |
| DT015 |                                                             | 337.89                                                  | 11.81                                              | 11.8                                                |
| DT017 | r                                                           | 399.45                                                  | 14.43                                              | 6.7                                                 |
| DT018 | r                                                           | 252.2                                                   | 8.43                                               | 7.7                                                 |
| DT019 | r                                                           | 335.72                                                  | 11.53                                              | 6.9                                                 |
| DT020 | r                                                           | 339.07                                                  | 11.90                                              | 5.6                                                 |
| DT021 | d                                                           | 327.27                                                  | 11.37                                              | 11.2                                                |
| DT022 |                                                             | 343.38                                                  | 12.04                                              | 12.1                                                |
| DT023 |                                                             | 349.24                                                  | 11.79                                              | 11.3                                                |
| DT024 |                                                             | 247.34                                                  | 8.06                                               | 6.2                                                 |
| DT025 |                                                             | 371.33                                                  | 13.00                                              | -                                                   |
| DT026 |                                                             | 303.18                                                  | 9.09                                               | 9.7                                                 |
| DT027 |                                                             | 304.02                                                  | 10.39                                              | 11.7                                                |
| DT028 |                                                             | 251.78                                                  | 8.35                                               | -                                                   |

**Supplementary Table S12. Clinical adverse events documented at least once**

| Max. CTCAE grade per patient | No. of patients (%) |           |         |         |     |
|------------------------------|---------------------|-----------|---------|---------|-----|
|                              | 0                   | 1         | 2       | 3       | ≥ 4 |
| Abdominal pain               | 23 (85.2)           | 4 (14.8)  |         |         |     |
| Arthralgia                   | 21 (77.8)           | 6 (22.2)  |         |         |     |
| Asthenia                     | 25 (92.6)           | 1 (3.7)   | 1 (3.7) |         |     |
| Bradycardia                  | 26 (96.3)           | 1 (3.7)   |         |         |     |
| Cephalgia                    | 24 (88.9)           | 3 (11.1)  |         |         |     |
| Constipation                 | 25 (92.6)           | 2 (7.4)   |         |         |     |
| Cough                        | 21 (77.8)           | 6 (22.2)  |         |         |     |
| Diarrhoea                    | 21 (77.8)           | 5 (18.5)  |         | 1 (3.7) |     |
| Dry skin                     | 19 (70.4)           | 7 (25.9)  | 1 (3.7) |         |     |
| Dysgeusia                    | 26 (96.3)           | 1 (3.7)   |         |         |     |
| Dyspnea                      | 20 (74.1)           | 7 (25.9)  |         |         |     |
| Edema                        | 22 (81.5)           | 5 (18.5)  |         |         |     |
| Fatigue                      | 20 (74.1)           | 5 (18.5)  | 2 (7.4) |         |     |
| Flatulence                   | 26 (96.3)           | 1 (3.7)   |         |         |     |
| Flu-like symptoms            | 17 (63.0)           | 9 (33.3)  | 1 (3.7) |         |     |
| Folliculitis / cellulitis    | 25 (92.6)           | 2 (7.4)   |         |         |     |
| Hair loss                    | 25 (92.6)           | 2 (7.4)   |         |         |     |
| Impaired vision              | 26 (96.3)           | 1 (3.7)   |         |         |     |
| Loss of appetite             | 22 (81.5)           | 5 (18.5)  |         |         |     |
| Muscle cramps                | 25 (92.6)           | 2 (7.4)   |         |         |     |
| Myalgia                      | 17 (63.0)           | 10 (37.0) |         |         |     |
| Nail dystrophy               | 25 (92.6)           | 2 (7.4)   |         |         |     |
| Nausea                       | 20 (74.1)           | 6 (22.2)  | 1 (3.7) |         |     |
| Neoplasms of the skin        | 24 (88.9)           | 3 (11.1)  |         |         |     |
| Paronychia                   | 26 (96.3)           | 1 (3.7)   |         |         |     |
| Parotitis                    | 26 (96.3)           | 1 (3.7)   |         |         |     |
| Pruritus                     | 20 (74.1)           | 6 (22.2)  | 1 (3.7) |         |     |
| Pyrexia                      | 22 (81.5)           | 4 (14.8)  |         | 1 (3.7) |     |
| Reduced LVEF                 | 21 (77.8)           | 5 (18.5)  | 1 (3.7) |         |     |
| Skin rash                    | 22 (81.5)           | 5 (18.5)  |         |         |     |
| Stomatitis                   | 26 (96.3)           | 1 (3.7)   |         |         |     |
| Urinary tract infection      | 26 (96.3)           |           | 1 (3.7) |         |     |
| Vertigo                      | 25 (92.6)           | 2 (7.4)   |         |         |     |
| Vomiting                     | 24 (88.9)           | 2 (7.4)   | 1 (3.7) |         |     |
| Weight gain                  | 25 (92.6)           | 1 (3.7)   | 1 (3.7) |         |     |
| Weight loss                  | 25 (92.6)           | 2 (7.4)   |         |         |     |
| Xerostomia                   | 24 (88.9)           | 3 (11.1)  |         |         |     |

CTCAE, Common Terminology Criteria for Adverse Events; LVEF, left ventricular ejection fraction

**Supplementary Table S13. Laboratory adverse events documented at least once**

| Max. CTCAE grade per patient        | No. of patients (%) |           |          |          |     |
|-------------------------------------|---------------------|-----------|----------|----------|-----|
|                                     | 0                   | 1         | 2        | 3        | ≥ 4 |
| Alkaline phosphatase elevated       | 9 (33.3)            | 16 (59.3) | 2 (7.4)  |          |     |
| ALT elevated                        | 23 (85.2)           | 4 (14.8)  |          |          |     |
| Anemia                              | 4 (14.8)            | 21 (77.8) | 2 (7.4)  |          |     |
| AST elevated                        | 20 (74.1)           | 6 (22.2)  | 1 (3.7)  |          |     |
| Bilirubin elevated                  | 26 (96.3)           | 1 (3.7)   |          |          |     |
| Creatine phosphokinase elevated     | 7 (25.9)            | 11 (40.7) | 5 (18.5) | 4 (14.8) |     |
| creatinine elevated                 | 15 (55.6)           | 12 (44.4) |          |          |     |
| Gamma glutamyl transferase elevated | 21 (77.8)           | 3 (11.1)  | 1 (3.7)  | 2 (7.4)  |     |
| Hyponatremia*                       | 20 (74.1)           | 6 (22.2)  |          |          |     |
| Leucopenia                          | 12 (44.4)           | 12 (44.4) | 1 (3.7)  | 2 (7.4)  |     |
| Lipase elevated                     | 13 (48.1)           | 9 (33.3)  |          | 5 (18.5) |     |
| Lymphopenia*                        | 14 (51.9)           | 3 (11.1)  | 7 (25.9) | 2 (7.4)  |     |
| Neutropenia                         | 20 (74.1)           | 4 (14.8)  | 2 (7.4)  | 1 (3.7)  |     |
| Thrombocytopenia                    | 25 (92.6)           | 2 (7.4)   |          |          |     |

ALT, alanine aminotransferase; AST, aspartate aminotransferase

\* data not available for one patient

**Supplementary Table S14. Dose reductions and treatment discontinuations**

|                         | permanent treatment discontinuation n (%) |            | temporary treatment discontinuation n (%) |               | dose reduction n (%) |            |
|-------------------------|-------------------------------------------|------------|-------------------------------------------|---------------|----------------------|------------|
|                         | dabrafenib                                | trametinib | dabrafenib                                | trametinib    | dabrafenib           | trametinib |
| none                    | 19 (70.4)                                 | 18 (66.7)  | 17 (63.0)                                 | 17 (63.0)     | 24 (88.9)            | 21 (77.8)  |
| adverse events          | 2 (7.4)*                                  | 3 (11.1)*  | 3+3** (22.2)                              | 4+4*** (29.6) | 2+1 (11.1)           | 1+5 (22.2) |
| end of adjuvant therapy | 3 (11.1)                                  | 3 (11.1)   | -                                         | -             | -                    | -          |
| other reason            | 3 (11.1)                                  | 3 (11.1)   | 4** (14.8)                                | 2 (7.4)       | -                    | -          |

\* two patients had permanent treatment discontinuation of dabrafenib *and* trametinib, one patient only of trametinib

\*\* one patient had temporary treatment discontinuation before *and* during the study

\*\*\* two patients additionally had temporary treatment discontinuations for other reasons

+ refers to patients with temporary treatment discontinuations or dose reductions *prior* to observation in the study



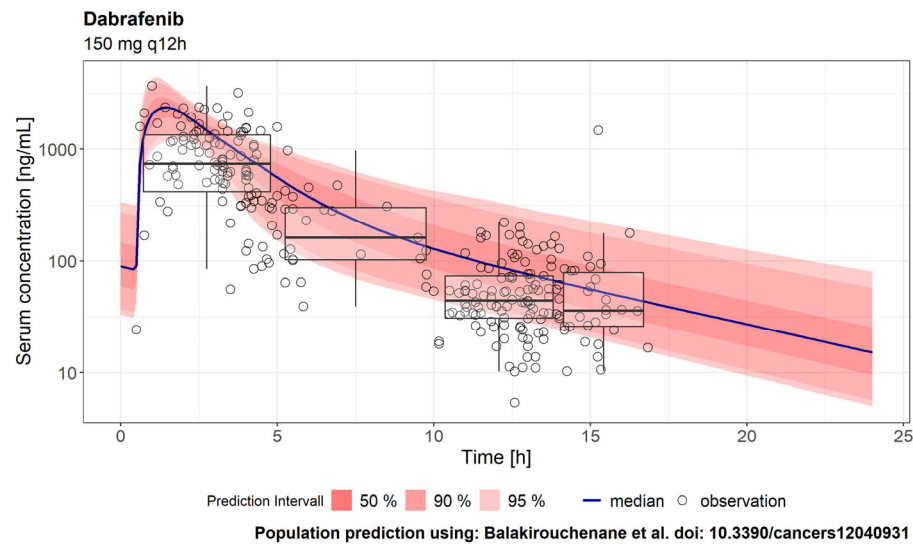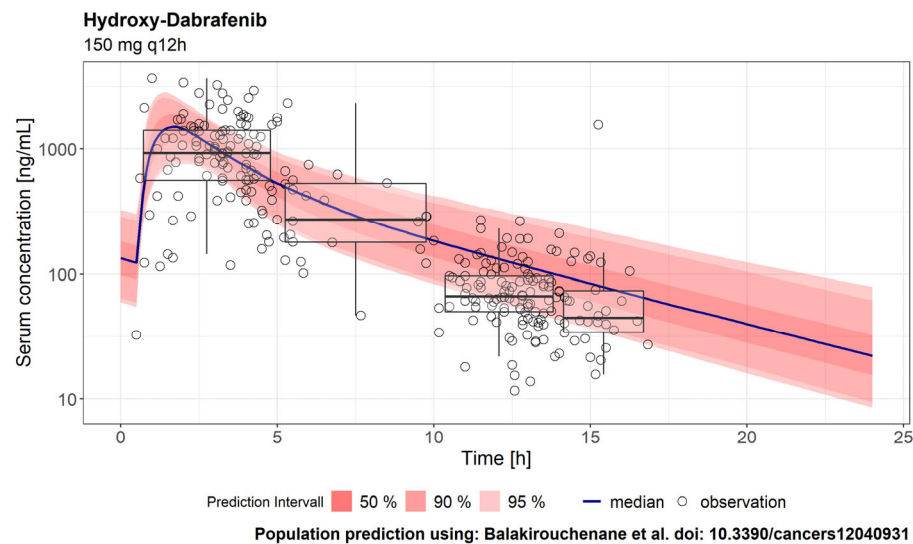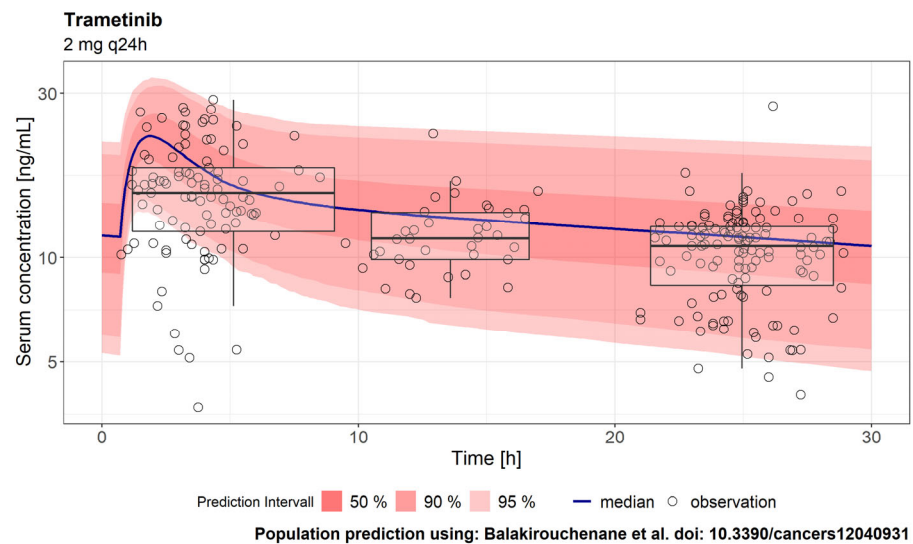

**Supplementary Figure S1. Simulated steady state pharmacokinetics vs. observed data.** Patient characteristics and dosages were used to simulate steady state pharmacokinetics with IIV on 1000 virtual patients. Simulated data was overlaid with the observed data.

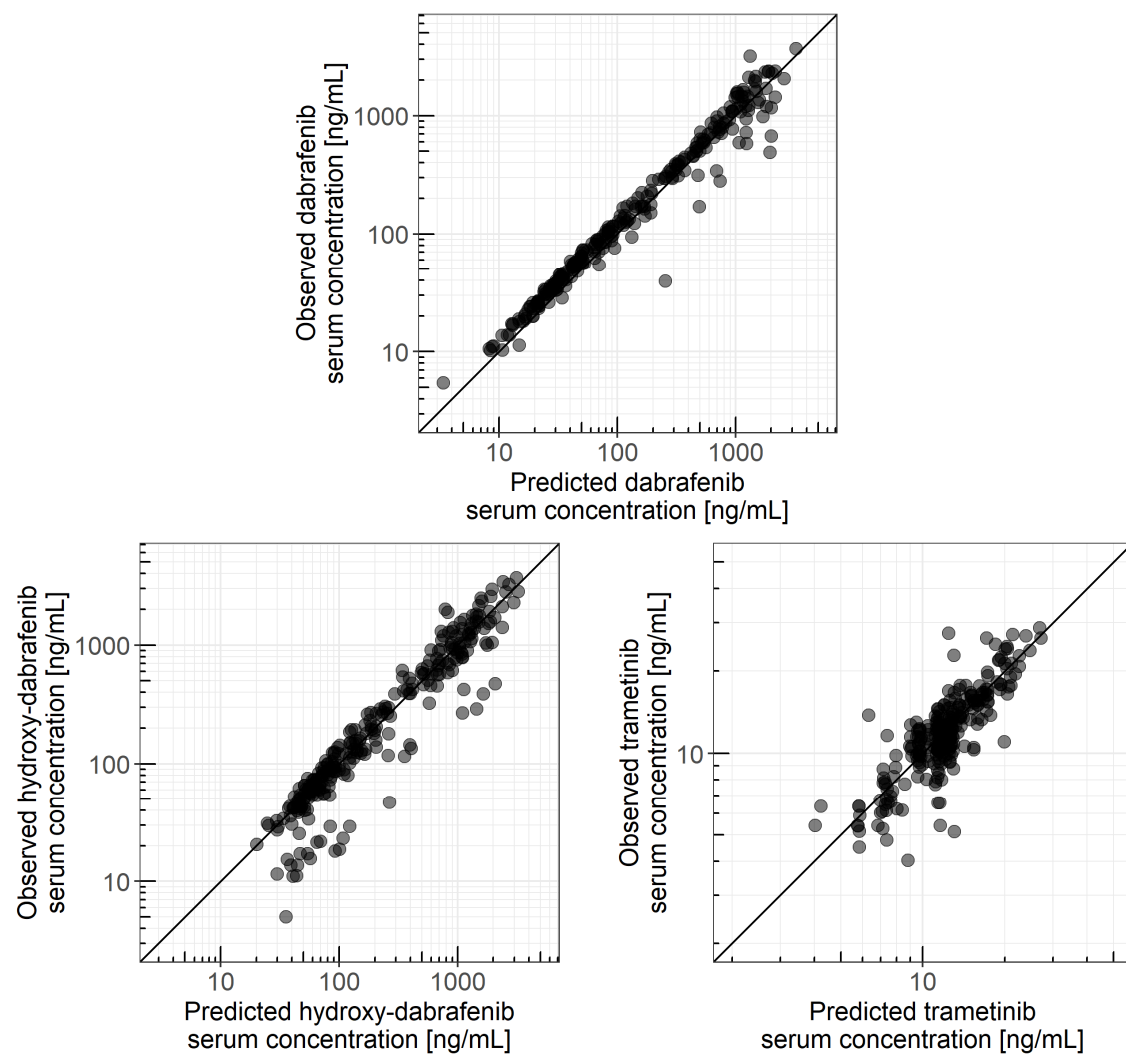

**Supplementary Figure S2. Individual observed vs. individual predicted serum concentrations.** Empirical Bayesian estimates were used for prediction of dabrafenib, hydroxy-dabrafenib and trametinib serum concentrations.

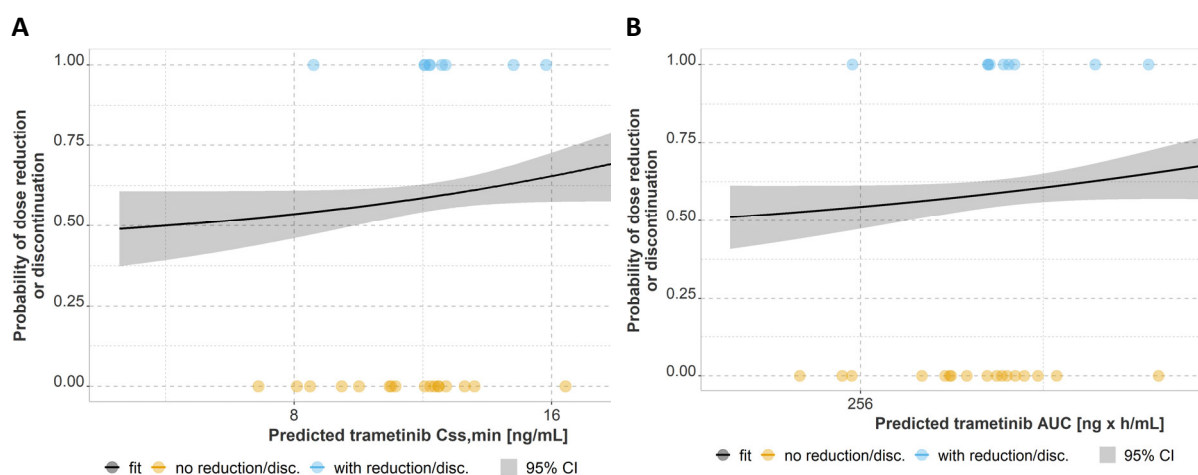

**Supplementary Figure S3. Trametinib exposure vs. probability of dose reduction or treatment discontinuation.** Logistic regression was used for analysis. **A:** Predicted trough concentration as exposure surrogate; intercept: -0.349, effect of  $C_{min}$ : 0.06178 (p-value: 0.0798) **B:** Predicted AUC<sub>τ</sub> as exposure surrogate; intercept: -0.436, effect of AUC<sub>τ</sub>: 0.0024 (p-value: 0.0988)

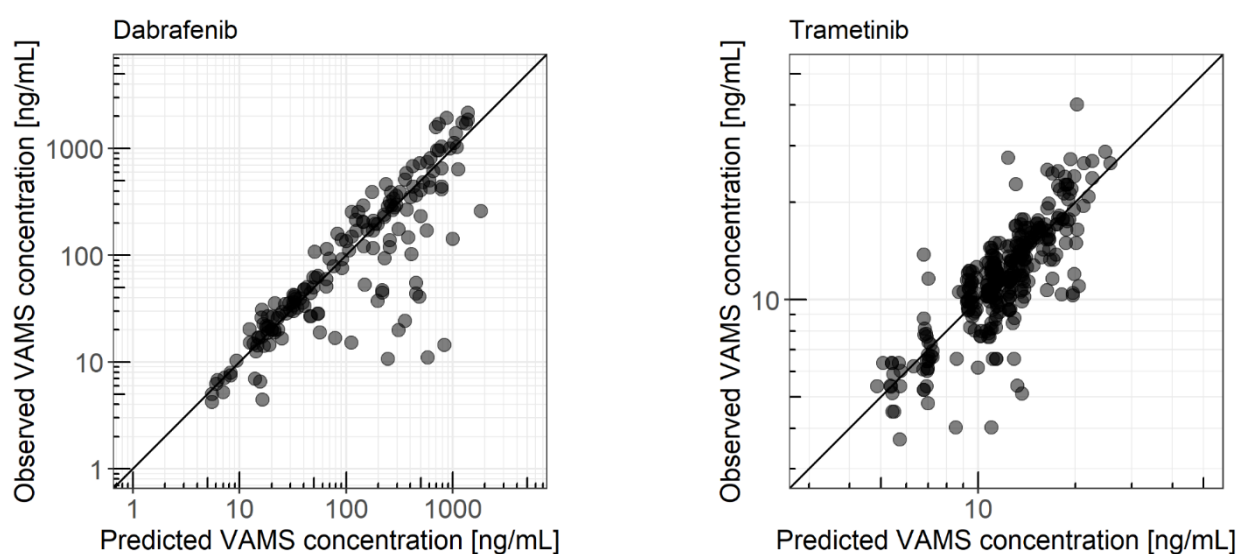

**Supplementary Figure S4. Individual predicted vs. observed VAMS concentrations.** Prediction of dabrafenib and trametinib concentrations was performed by using the consolidated datasets.

**A**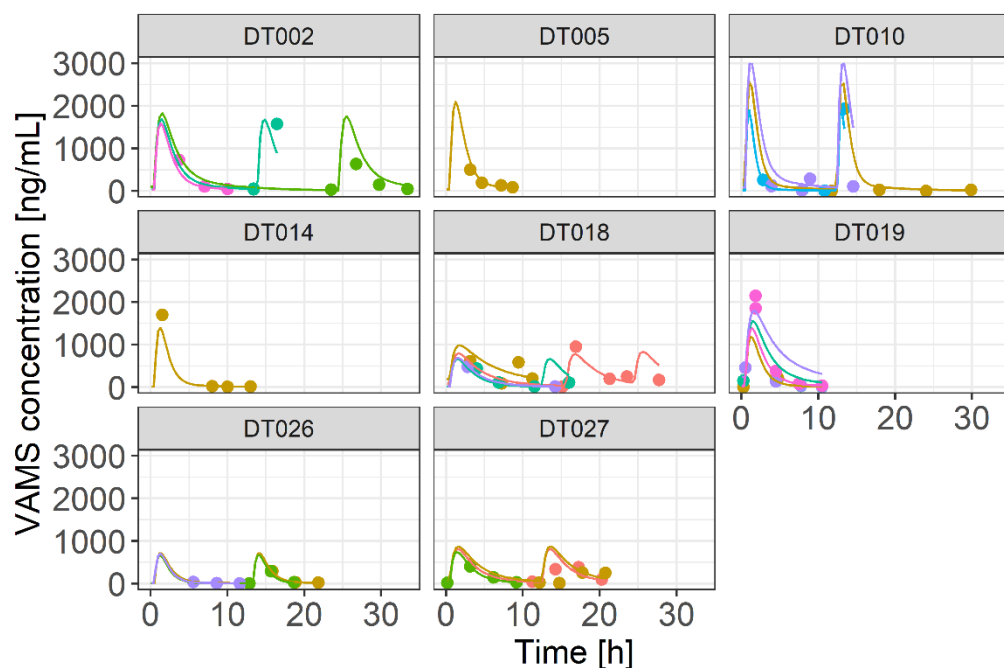**B**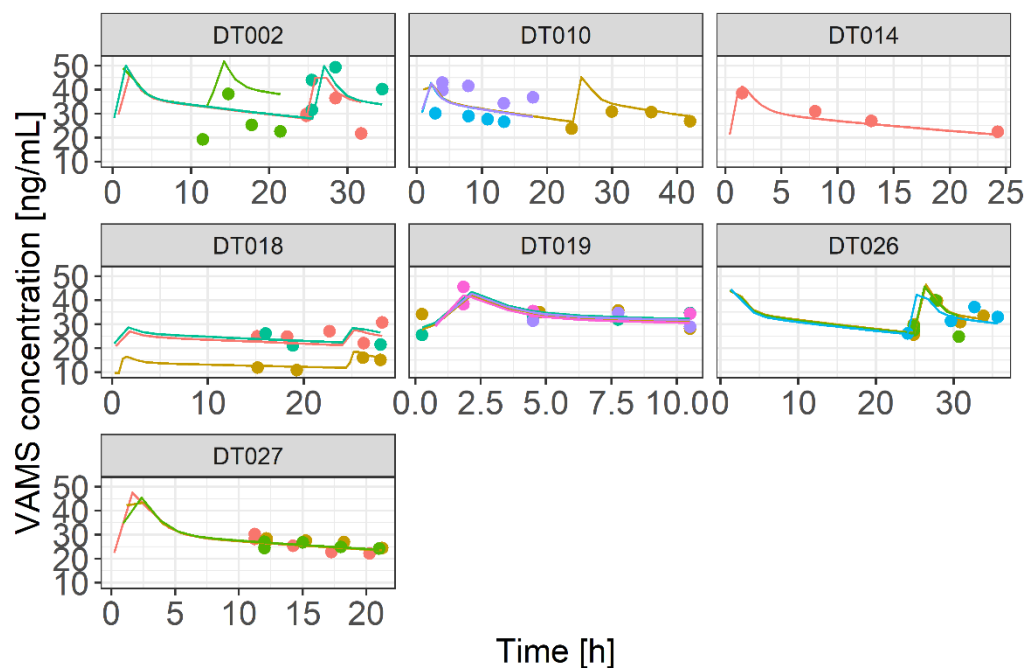

**Supplementary Figure S5. At-home sampled VAMS concentration-time profiles.** Points are individual measured VAMS concentrations; lines represent the fitted concentration time curve using the MAP approach. Different colours indicate different occasions of at-home sampling of the same patient. **A:** At-home sampled dabrafenib VAMS concentrations (90 samples, 8 patients). **B:** At-home sampled trametinib VAMS concentrations (84 samples, 7 patients). DT018 was not in steady state on one occasion. DT018 and DT019 received 1 mg and 1.5 mg q24h of trametinib, respectively. DT005 was on dabrafenib monotherapy.
